# Supplementary material
Source: PubMed Central journal article supplement (PMC4810463)
Supplement: MCB.00758-15_zmb999101164so1.pdf [file MCB.00758-15_zmb999101164so1.pdf]

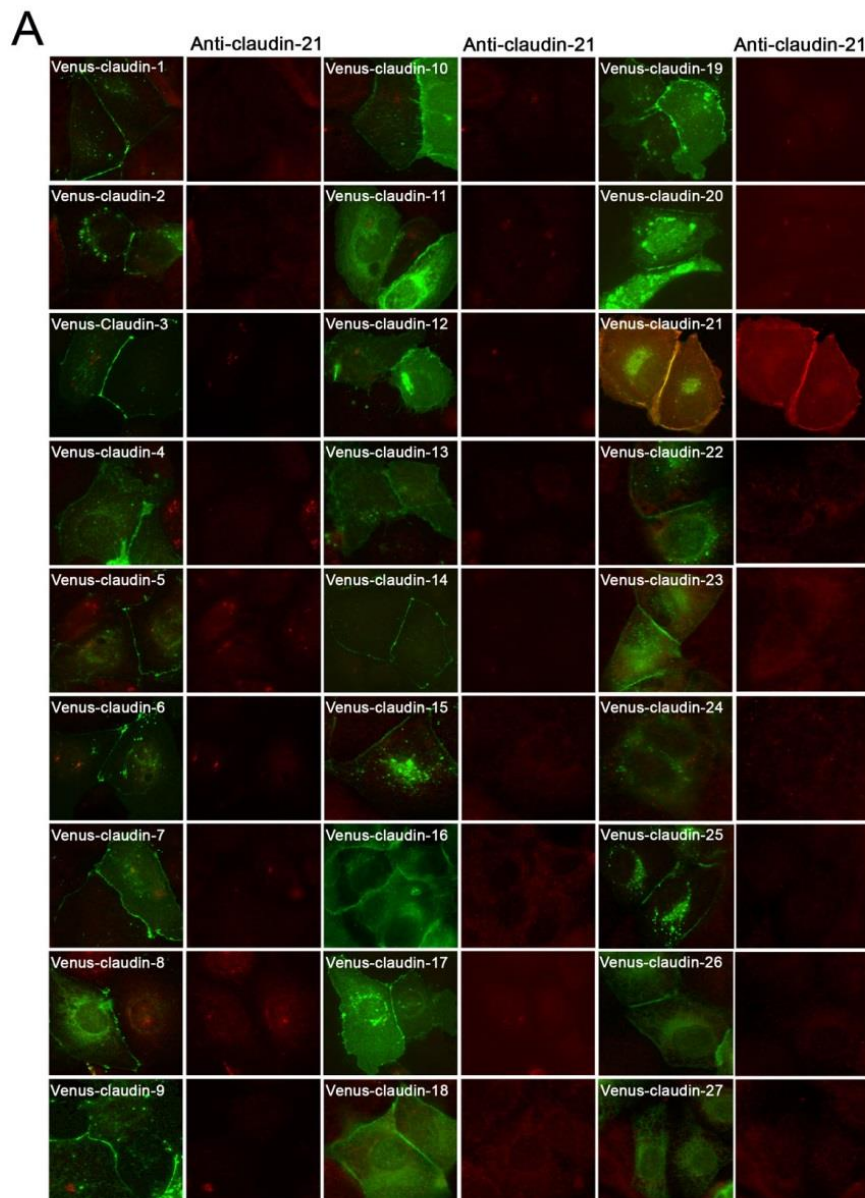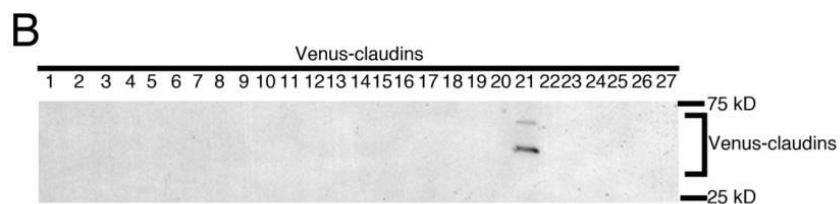

**Supplementary Figure S1 Tanaka et al.**

**Supplementary Figure S1**

(A, B) Immunofluorescence (A) and immunoblots (B) of mouse claudins expressed in MDCK I cells. The polyclonal antibody (pAb) for claudin-21 specifically recognized claudin-21 among the 27 mouse claudins. Green, Venus-tagged claudins (Venus-claudins); red, claudin-21 antibody labeling.

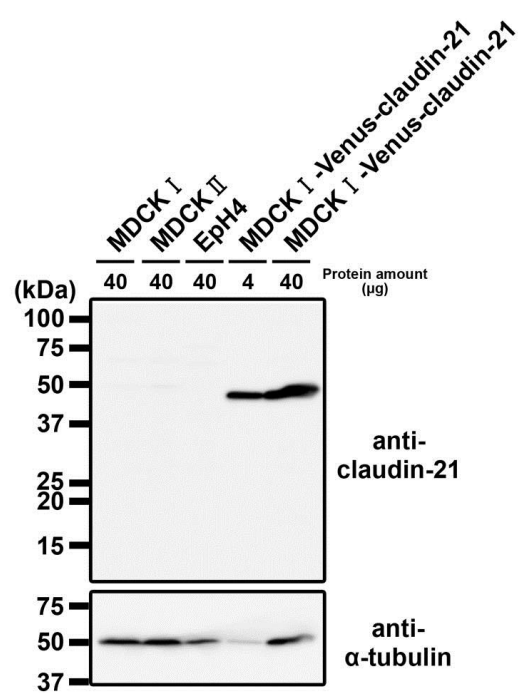

**Supplementary Figure S2 Tanaka et al.**

**Supplementary Figure S2**

Immunoblots for claudin-21 in MDCK I, MDCK II, Eph4 or claudin-21-expressing transfectant of MDCK I (MDCK I-Venus-claudin-21) cells. Claudin-21 was detected by the pAb for claudin-21. Tubulin was detected as loading controls. The amounts of loaded proteins were shown.

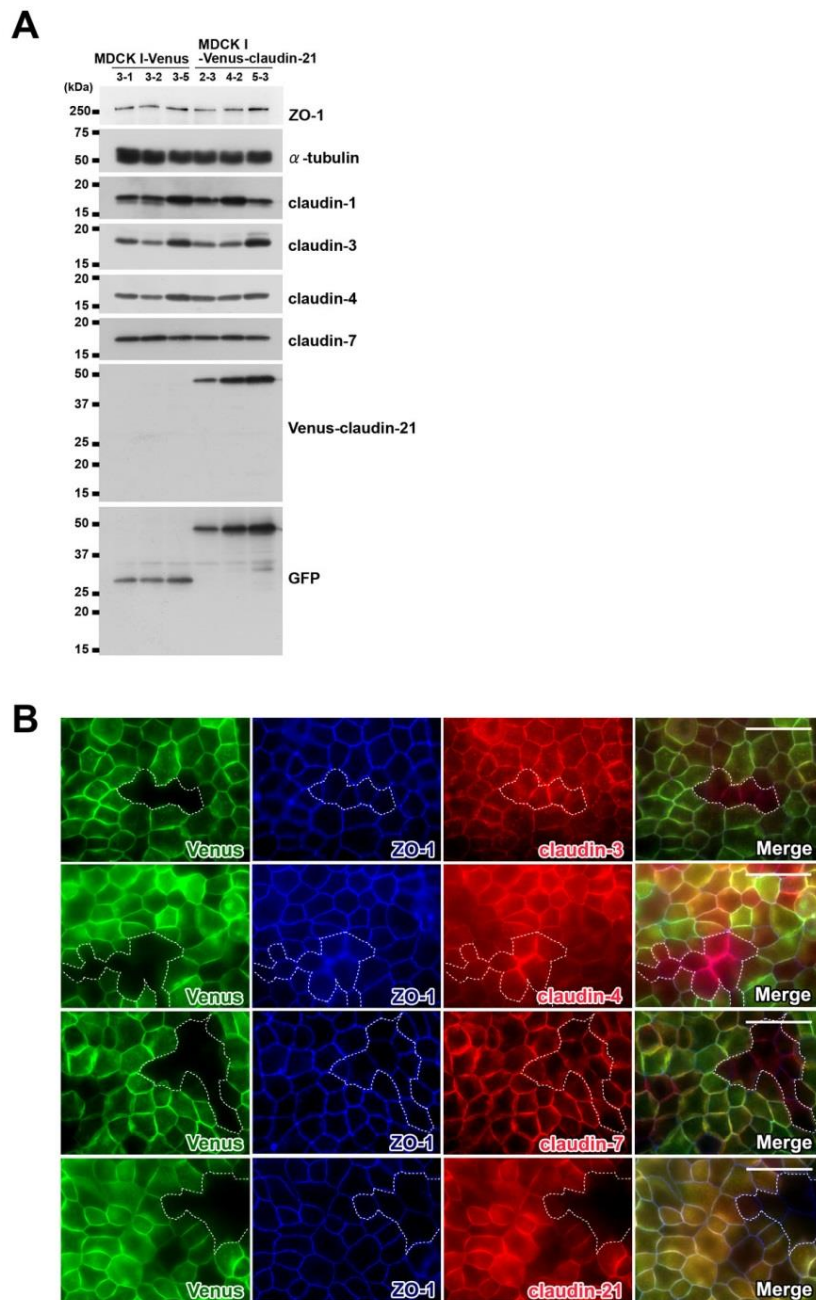

Supplementary Figure S3 Tanaka et al.

**Supplementary Figure S3**

(A) Immunoblots for TJ-related proteins in mock-transfected MDCK I (MDCK I-Venus) or claudin-21-expressing transfectant of MDCK I (MDCK I-Venus-claudin-21) cells.

(B) Immunofluorescence micrographs of TJ-related proteins in a mixed culture of MDCK I-Venus and MDCK I-Venus-claudin-21 cells co-stained with an anti-GFP pAb, an anti-ZO-1 Ab and each anti-TJ-related proteins pAb. The anti-GFP- (green), the anti-ZO-1- (blue) and the anti-TJ-related proteins-positive signals (red) are shown. Bar: 50  $\mu$ m

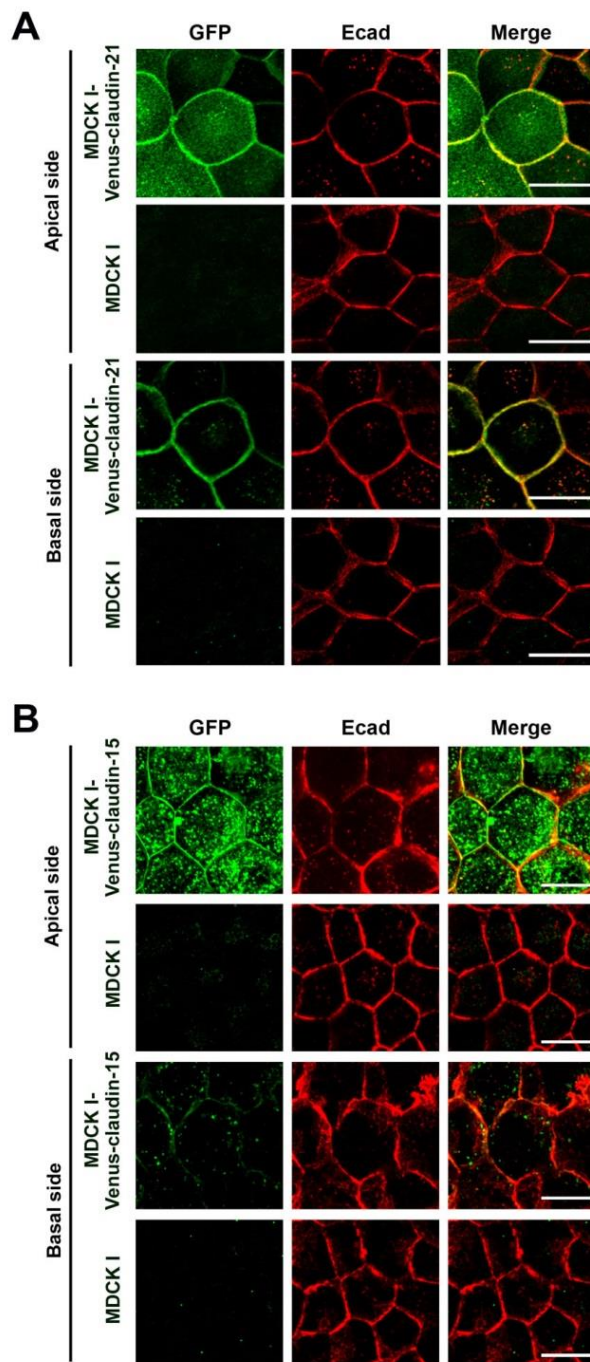

Supplementary Figure S4 Tanaka et al.

**plementary Figure S4**

MDCK I, claudin-21-expressing transfectant of MDCK I (MDCK I-Venus-claudin-21) or claudin-15-expressing transfectant of MDCK I (MDCK I-Venus-claudin-15) were cultured to confluence in glass coverslips and examined by the confocal laser scanning microscopy. (A) MDCK I and MDCK I-Venus-claudin-21 (B) MDCK I and MDCK I-Venus-claudin-15 cells were double stained with an anti-GFP pAb and an anti-E-cadherin mAb. The anti-GFP-positive signals (green) are overlapped with the anti-E-cadherin-positive signals (red). Stacked images of apical or basal side of the epithelial cells are shown respectively. Green, GFP; Red, E-cadherin (Ecad). Bar: 10  $\mu$ m.

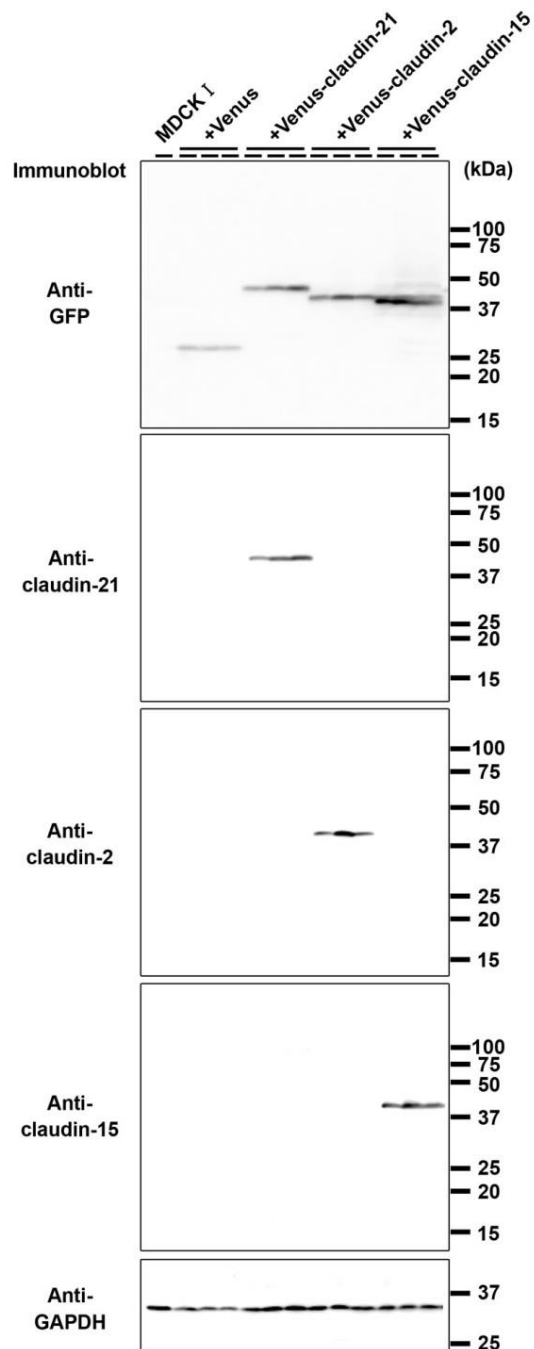

**Supplementary Figure S5 Tanaka et al.**

**Supplementary Figure S5**

Immunoblots for claudin-21, -2 or -15 in MDCK I, mock-transfected MDCK I (MDCK I-Venus), claudin-21-expressing transfectant of MDCK I (MDCK I-Venus-claudin-21) and claudin-15-expressing transfectant of MDCK I (MDCK I-Venus-claudin-15) cells. Venus or venus-tagged claudins were detected by the anti-GFP monoclonal antibody (mAb). Claudin-21 was detected by the anti-claudin-21 pAb. GAPDH was detected as loading controls.

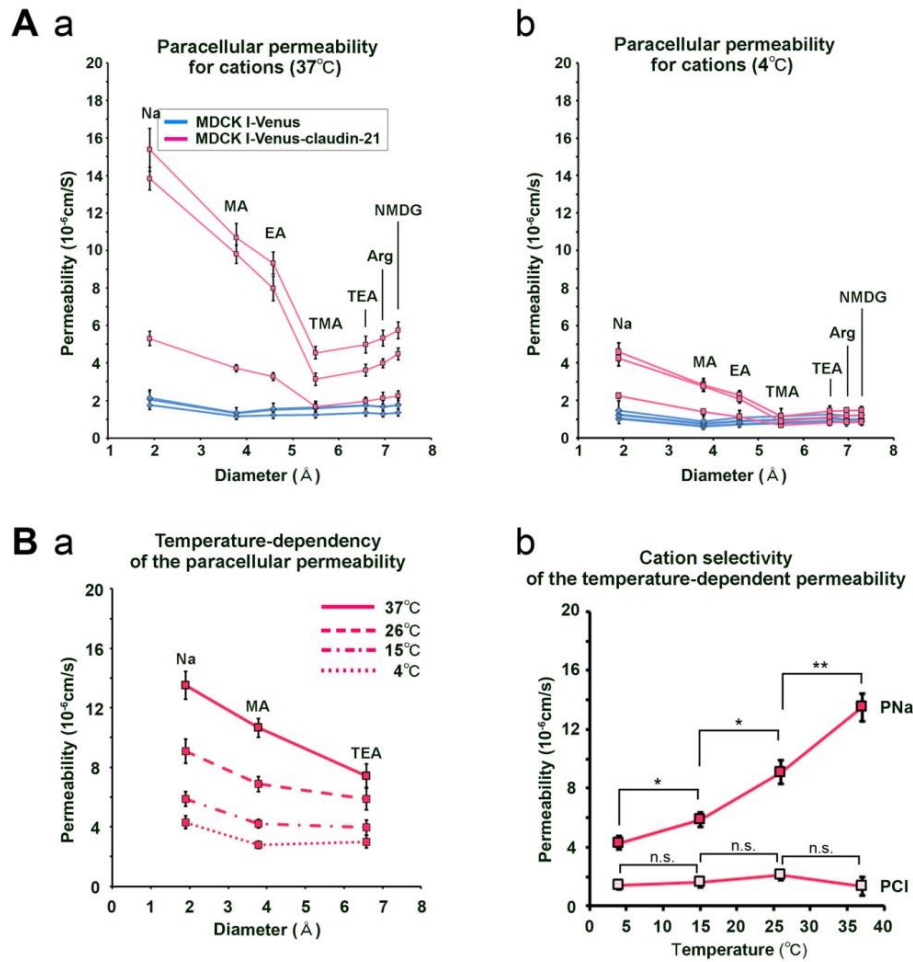

Supplementary Figure S6 Tanaka et al.

#### Supplementary Figure S6

(A) Transepithelial ion permeabilities for Na<sup>+</sup>, MA<sup>+</sup>, EA<sup>+</sup>, TMA<sup>+</sup>, TEA<sup>+</sup>, Arg<sup>+</sup> and NMDG<sup>+</sup> in all of 3 clones of mock-transfected MDCK I (MDCK I-Venus) and claudin-21-expressing transfectant of MDCK I (MDCK I-Venus-claudin-21) cells at 37°C (a) or 4°C (b) (n=4/group).

(B) (a) Transepithelial permeabilities for Na<sup>+</sup>, MA<sup>+</sup>, and TEA<sup>+</sup> at 37 °C, 26 °C, 15 °C or 4 °C of MDCK I-Venus-claudin-21 cells. The averaged results from 2 clones of claudin-21 highly expressing transfectant MDCK I cells (n=6/group) are shown.

(b) Transepithelial ion permeabilities for Na<sup>+</sup> and Cl<sup>-</sup> at 37 °C, 26 °C, 15 °C or 4 °C of MDCK I-Venus-claudin-21 cells. The averaged results from 2 clones of claudin-21 highly-expressing transfectant of MDCK I cells (n=6/group) are shown. n.s., not significant; \*, p<0.05.; \*\*, p<0.01.

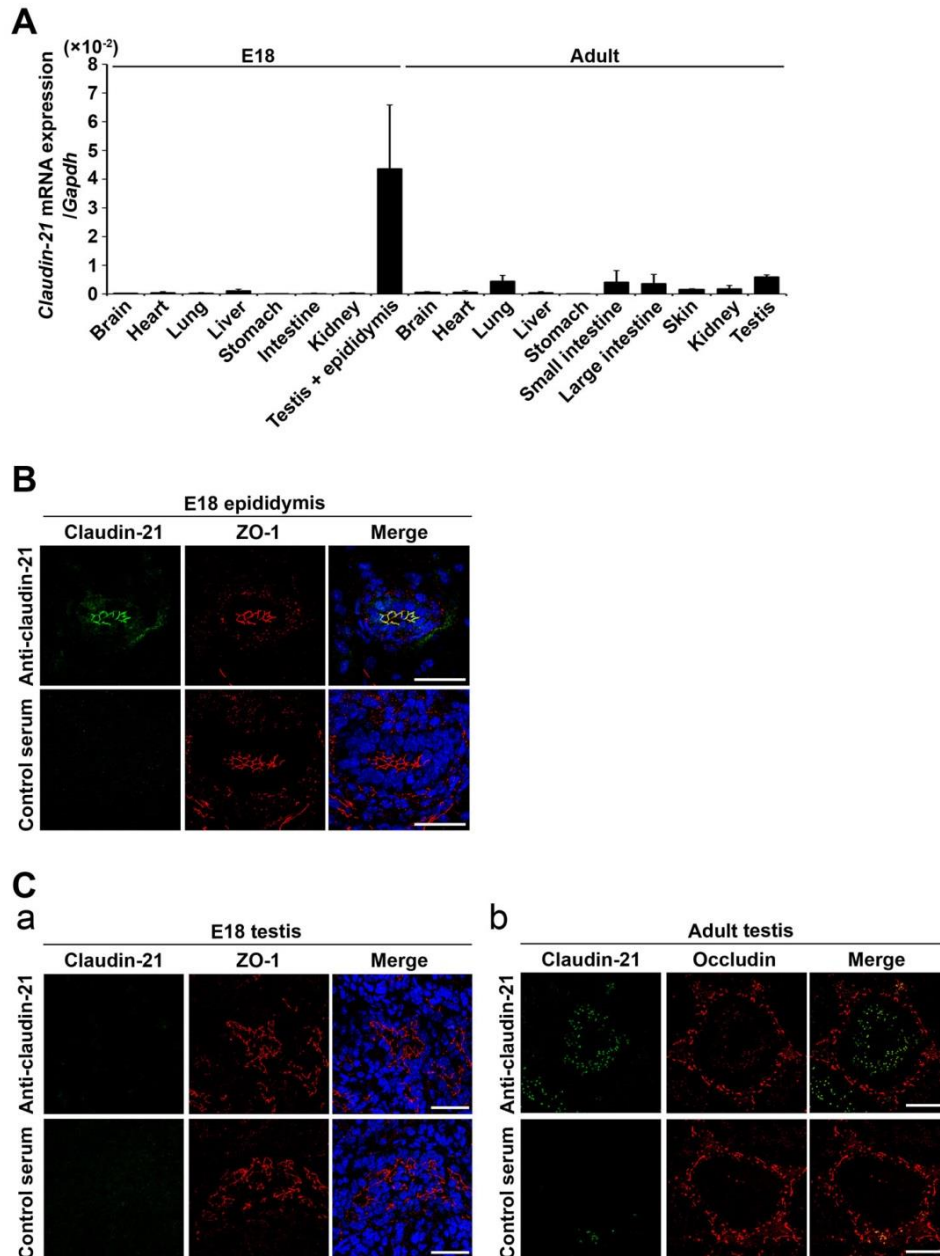

Supplementary Figure S7 Tanaka et al.

#### Supplementary Figure S7

(A) The probe-based quantitative RT-PCR for claudin-21 of E18.5- and adult -mouse tissues (n=3/group). Gapdh mRNA was detected as reference gene mRNA expression and the relative expression levels of claudin-21 mRNA versus gapdh mRNA were shown (n=3/group).

(B) Immunofluorescence micrographs of the epididymis from E18-mouse co-stained with an anti-claudin-21 pAb and an anti-ZO-1 mAb, or anti-serum and anti-ZO-1 mAb. Dapi was used for the detection of nucleus. The anti-claudin-21-positive signals or the anti-serum positive signals (green), the anti-ZO-1-positive signals (red) and nuclei (blue) are shown. Bar: 50  $\mu$ m.

(C) (a) Immunofluorescence micrographs of the testis from E18-mouse co-stained with an anti-claudin-21 pAb and an anti-ZO-1 mAb, or anti-serum and anti-ZO-1 mAb. Dapi was used for the detection of nucleus. The anti-claudin-21-positive signals or the anti-serum-positive signals (green), the anti-ZO-1-positive signals (red) and nuclei (blue) are shown. Bars: 50  $\mu$ m. (b) Immunofluorescence micrographs of the testis from adult-mouse co-stained with an anti-claudin-21 pAb and an anti-occludin mAb, or anti-serum and anti-occludin mAb. The anti-claudin-21-positive signals or the anti-serum positive signals (green), the anti-occludin-positive signals (red) are shown. Bar: 50  $\mu$ m.

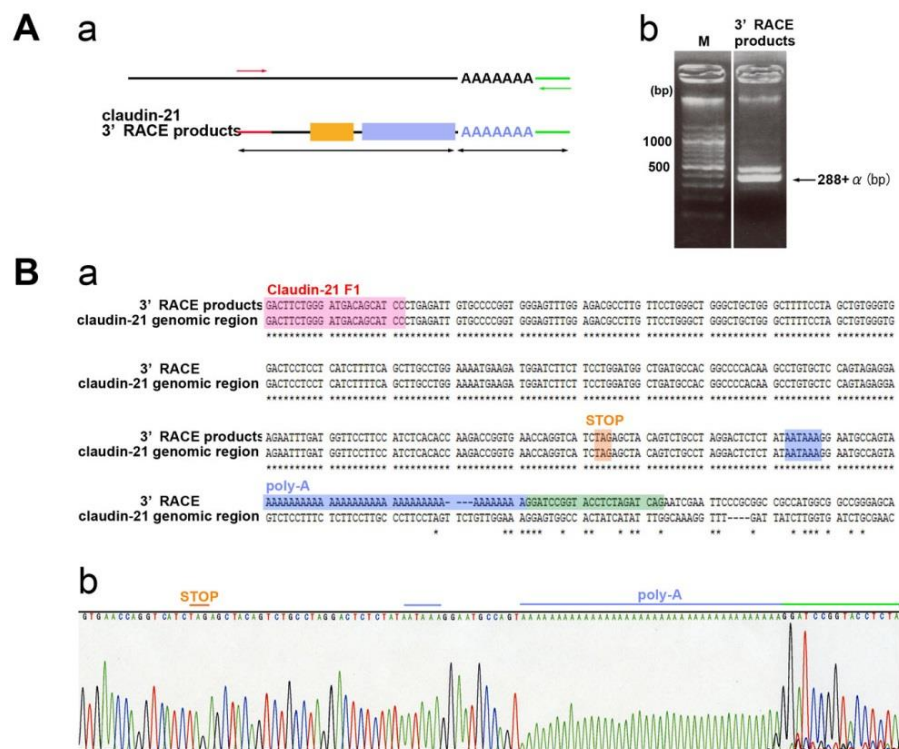

**Supplementary Figure S8 Tanaka et al.**

**Supplementary Figure S8**

(A) (a) Schematic diagram of the claudin-21 3'RACE analysis. (b) PCR products resulting from the 3'RACE-PCR. M: 100-bp molecular weight markers.

(B) (a) Alignment of the sequence from 3'RACE products with the sequence of claudin-21's genomic region. (b) Partial electropherogram of claudin-21's 3'RACE products showing the poly-A tail.

| Primers         | Sequences (5'→3' )                       | Purpose                  |
|-----------------|------------------------------------------|--------------------------|
| RT-oligo-dT     | CTGATCTAGAGGTACCGGATCC<br>TTTTTTTTTTTTTT | Reverse<br>transcription |
| Claudin-21 F1   | GACTTCTGGGATGACAGCATCC                   | 3' RACE                  |
| 3' RACE Reverse | CTGATCTAGAGGTACCGGATCC                   | 3' RACE                  |

**Table1 Tanaka et al.**

**Supplementary Table 1**

Primers list used for claudin-21 3'RACE analysis was shown. The RT-oligo-dT primer was used for reverse transcription. The claudin-21 F1 and 3'RACE Reverse primers were used for amplification for the partial fragment of claudin-21.
